# Supplementary material for: MerR and ChrR mediate blue light induced photo-oxidative stress response at the transcriptional level in Vibrio cholerae
Source: PubMed Central journal article supplement (PMC5241685; doi:10.1038/srep40817), 2017-01-18
Supplement: srep40817-s1.pdf [file srep40817-s1.pdf]

**MerR and ChrR mediate blue light induced photo-oxidative stress response at the transcriptional level in *Vibrio cholerae***

Mehmet Tardu<sup>1</sup>

Email: mtardu@ku.edu.tr

Selma Bulut<sup>2</sup>

Email: sbulut@ku.edu.tr

Ibrahim Halil Kavakli<sup>1,2,3\*</sup>

Email: hkavakli@ku.edu.tr

<sup>1</sup>Computational Science and Engineering, Koc University, Rumeli Feneri Yolu, Sariyer, Istanbul, Turkey

<sup>2</sup>Chemical and Biological Engineering, Koc University, Rumeli Feneri Yolu, Sariyer, Istanbul, Turkey

<sup>3</sup>Molecular Biology and Genetics, Koc University, Rumeli Feneri Yolu, Sariyer, Istanbul, Turkey

\*Corresponding author

Tel:+90 212 338 1708

Fax: :+90 212 338 1548

E-mail: hkavakli@ku.edu.tr

## Supplementary Figure Legends

**Supplementary Figure S1:** Comparison of gene transcript levels between replicates of dark- and blue-light-treated samples. Correlation plots for transcript-level RPKM values between replicates of wild-type, *ΔChrR*, *ΔChrRΔMerR* and *Δcry1Δcry2Δphr* knockout cells treated with dark or BL. Pearson  $R^2$  values for correlation are included in plots.

**Supplementary Figure S2:** Validation of RNA-seq data by qRT-PCR. RNA-seq results of selected 21 DEGs (Set2) in response to blue light were compared with qRT-PCR results. Blue bars with standard errors represent relative transcript levels determined by qRT-PCR (with respect to dark treated cells,  $\log_2$  fold) from three independent biological replicates. Green bars represent transcript levels determined using RNA-seq.

**Supplementary Figure S3:** Effect of blue light (BL) and red light (RL) on the expression levels of differentially expressed genes (DEGs). Transcript levels of selected 21 DEGs (Set2) were determined after exposure of wild-type cells to BL and RL. Blue (BL exposure) and red (RL exposure) bars with standard errors represent relative mRNA expression levels with respect to dark conditions ( $\log_2$  fold) determined by qRT-PCR from three independent biological replicates.  $n = 6$ , \*  $p < 0.05$ , Student's t-test.

**Supplementary Figure S4:** Reactive oxygen species (ROS) accumulation in wild-type (WT), *ΔChrR* and *ΔChrRΔMerR* knock out cells after blue light (BL) exposure. Cells were exposed to BL ( $50 \mu\text{moles m}^{-2}\text{s}^{-1}$ ) for 45 min, then samples were collected and total ROS amount was measured using 2',7' dichlorofluorescein. Fold change was calculated between dark- and BL-treated samples at indicated times.

**Supplementary Figure S5:** Flow-chart of ROS measurement protocol.

**Supplementary Figure S6:** Flow-chart of RNA-seq analysis.

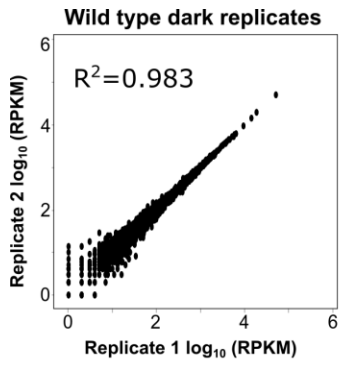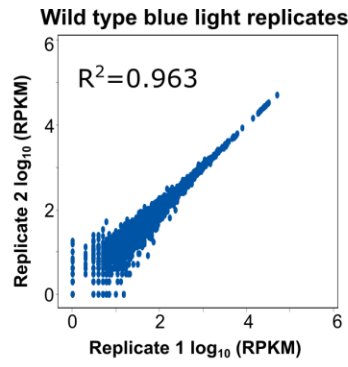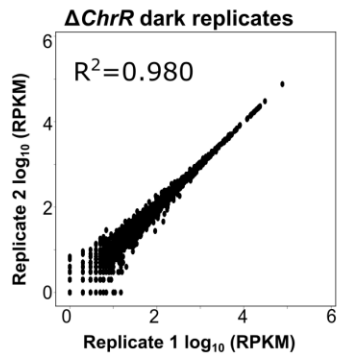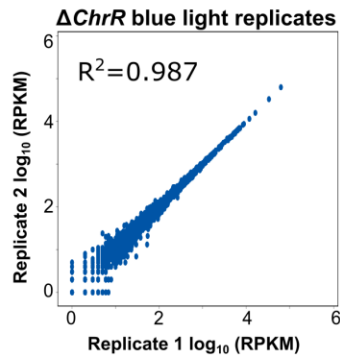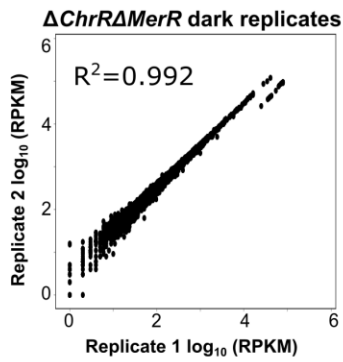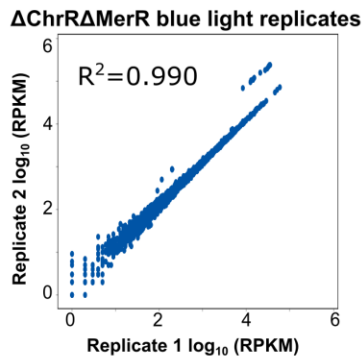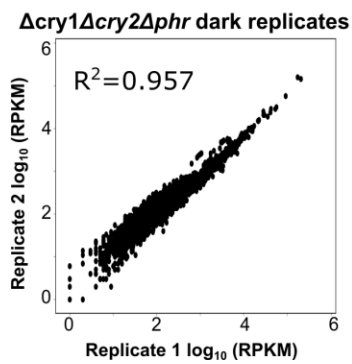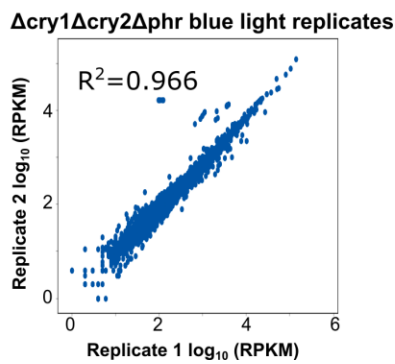

**Supplementary Figure S1**

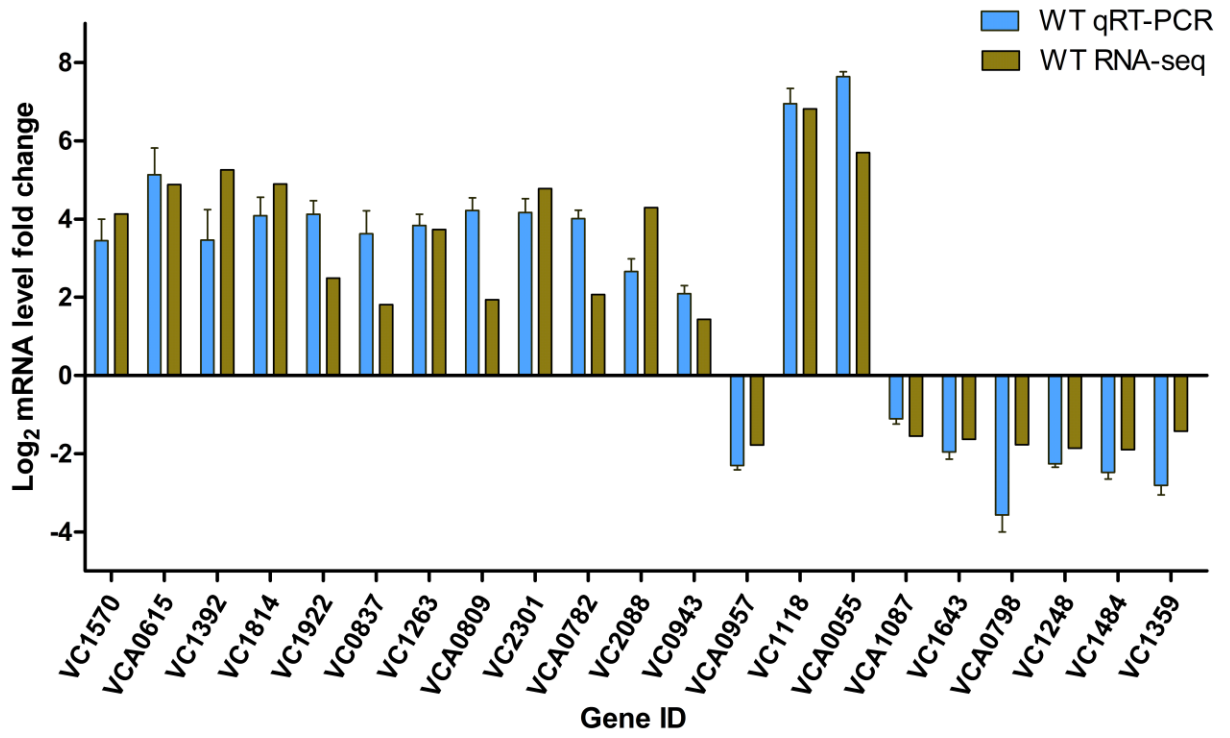

Supplementary Figure S2

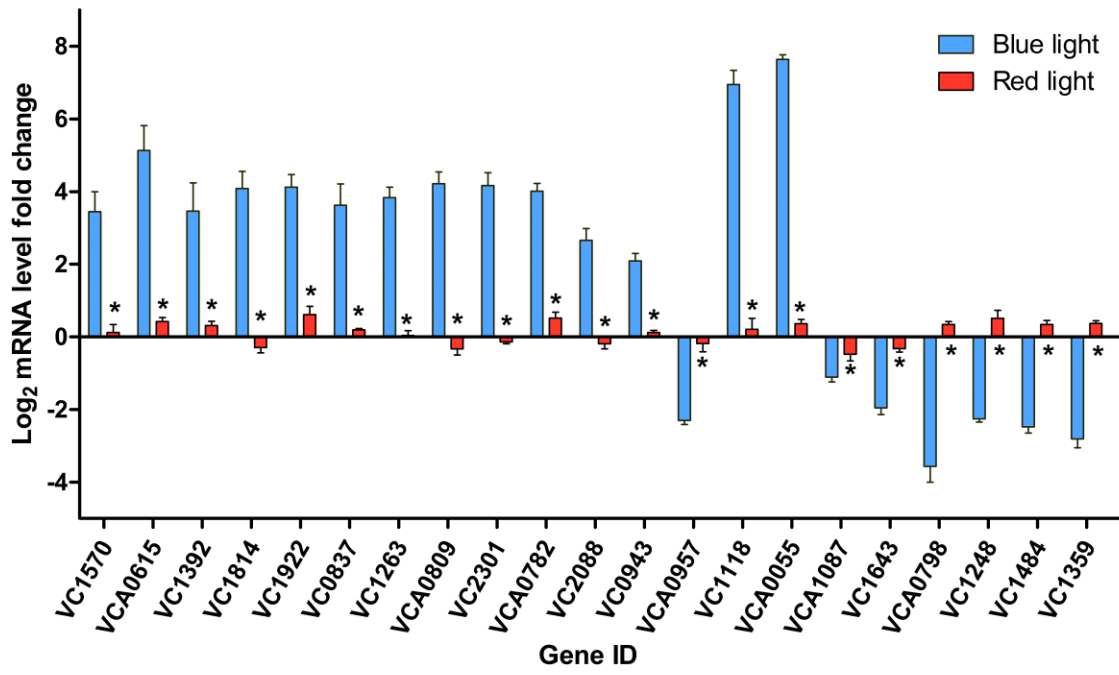

Supplementary Figure S3

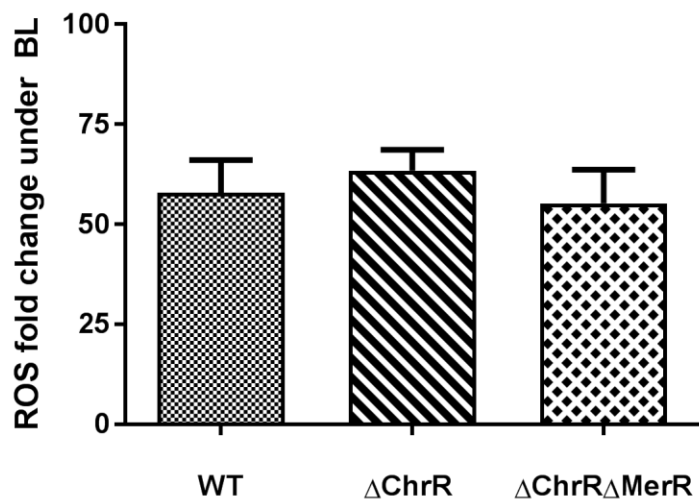

**Supplementary Figure S4**

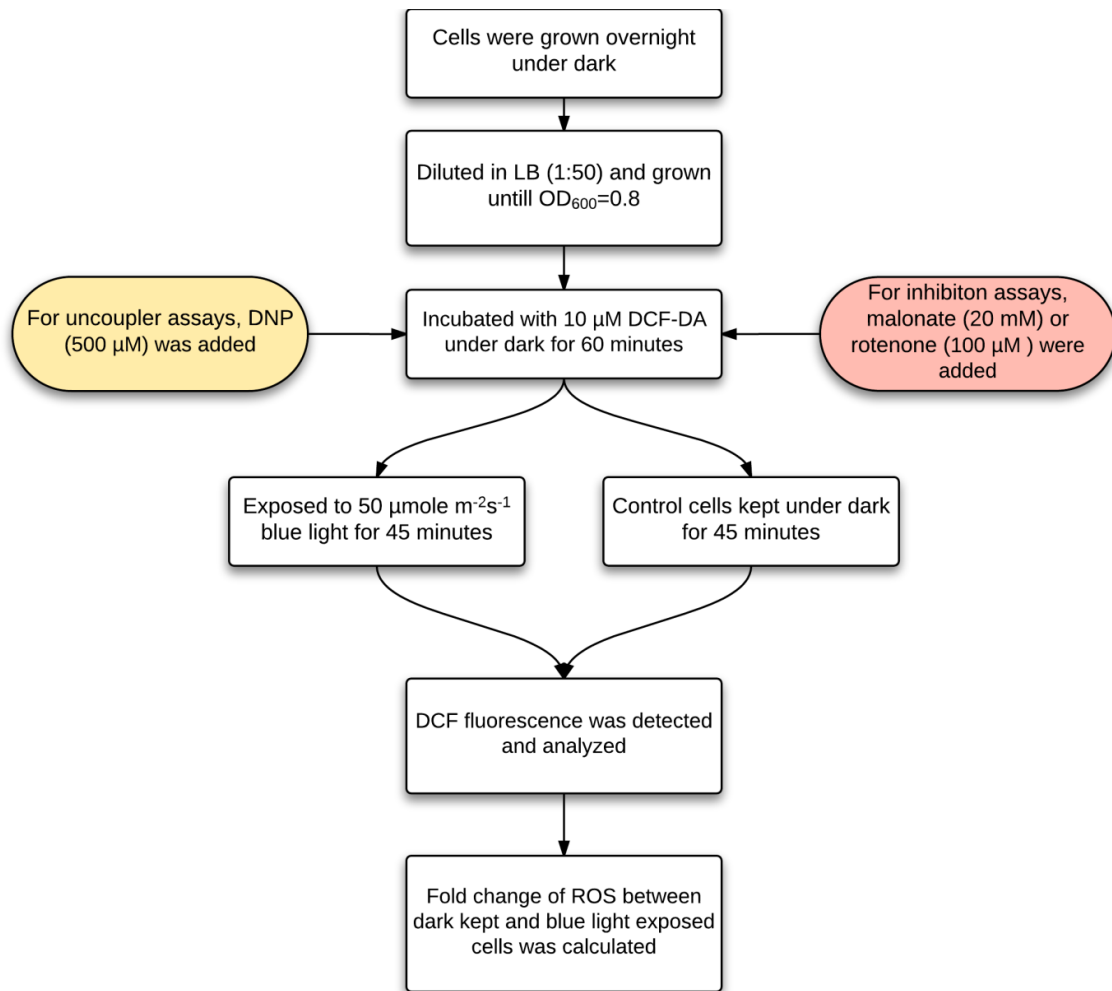

**Supplementary Figure S5**

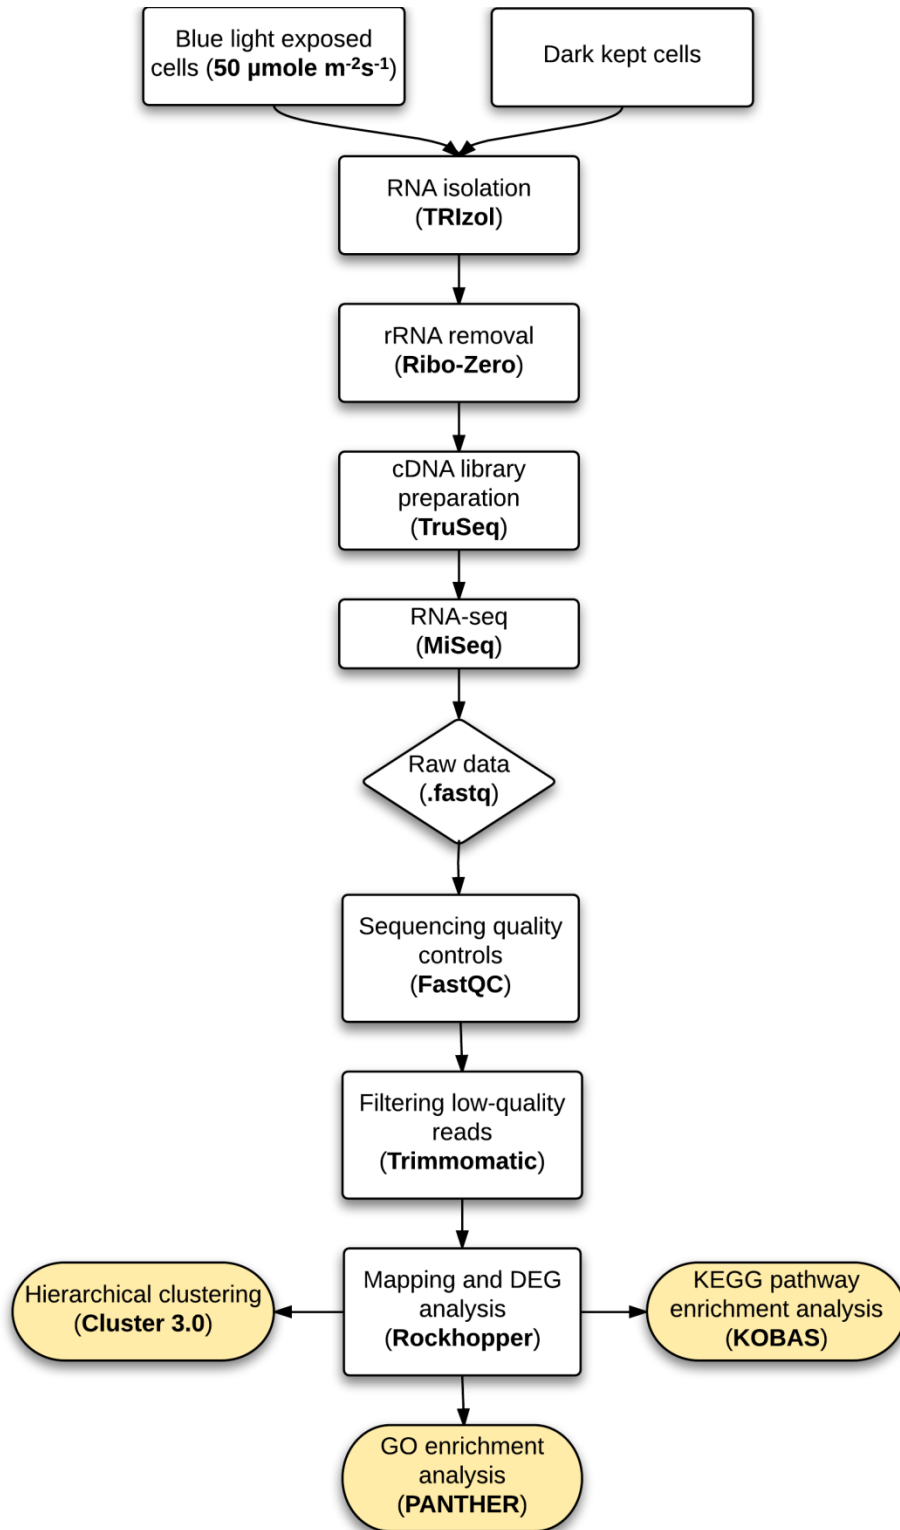

**Supplementary Figure S6**
